# Supplementary material
Source: publisher site journal article supplement (https://www.dovepress.com/article/538911)
Supplement: Supplementary file 1 [file 538911%20Revised%20Supplementary%20Materials.docx]

**Supplementary Table 1. ROC curves for optimal cut-points of thyroid hormone sensitivity indices**

| **index** | **Cut-off** | **AUC** | **Specificity%** | **Sensitivity%** | **P** | |
| --- | --- | --- | --- | --- | --- | --- |
| **T2DM** |  |  |  |  |  | |
| TFQI-FT4 | 0.069 | 0.669 | 0.711 | 0.561 | **＜0.001** | |
| TFQI-FT3 | 0.129 | 0.665 | 0.505 | 0.773 | **＜0.001** | |
| TSHI | 3.122 | 0.635 | 0.753 | 0.492 | **＜0.001** | |
| TT4RI | 32.193 | 0.584 | 0.577 | 0.591 | **0.030** | |
| TT3RI | 10.607 | 0.584 | 0.619 | 0.538 | **0.030** | |
| **Non-DM** |  |  |  |  |  | |
| TFQI-FT3 | 0.278 | 0.610 | 0.857 | 0.353 | **0.004** | |
| FT3/FT4 | 0.318 | 0.663 | 0.554 | 0.773 | **＜0.001** | |
| **Note:**  Bold values indicate statistically significant associations (p < 0.05)  Abbreviations: FT3, free triiodothyronine; FT4, free thyroxine; TSH, thyroid-stimulating hormone; TFQI-FT4, the thyroid feedback quantile-based index calculated by FT4; TFQI-FT3, the thyroid feedback quantile-based index calculated by FT3; TSHI, TSH index; TT4RI, thyrotropin T4 resistance index; TT3RI, thyrotropin T3 resistance index; FT3/FT4, FT3 to FT4 ratio; ROC, receiver operating characteristic curve;AUC,Area Under the Curve | | | | | |  |

**Supplementary Table 2. Correlation between thyroid parameters and non-invasive fibrosis panels in patients with T2DM and NAFLD**

| **Thyroid parameters** | **NFS** | | **FIB-4** | | **APRI** | |
| --- | --- | --- | --- | --- | --- | --- |
| **r** | **p** | **r** | **p** | **r** | **p** |
| FT3 | 0.009 | 0.894 | −0.081 | 0.223 | 0.182 | **0.006** |
| FT4 | −0.053 | 0.428 | −0.147 | **0.027** | 0.104 | 0.116 |
| TSH | 0.002 | 0.974 | −0.052 | 0.438 | −0.042 | 0.528 |
| TFQI-FT4 | −0.018 | 0.785 | −0.117 | 0.078 | 0.080 | 0.229 |
| TFQI-FT3 | −0.013 | 0.841 | −0.106 | 0.108 | 0.064 | 0.335 |
| TSHI | −0.020 | 0.760 | −0.124 | 0.062 | 0.046 | 0.478 |
| TT4RI | −0.001 | 0.985 | −0.091 | 0.172 | −0.002 | 0.980 |
| TT3RI | 0.004 | 0.947 | −0.073 | 0.271 | 0.005 | 0.935 |
| FT3/FT4 | 0.052 | 0.434 | 0.031 | 0.638 | 0.051 | 0.444 |
| **Notes:**  Spearman’s correlation analysis was used to calculate the correlation coefficient (r),  Bold values indicate statistically significant associations (p < 0.05)  Abbreviations: APRI, aspartate aminotransferase to platelet ratio index; FIB-4, fibrosis-4 index; FT3, free triiodothyronine; FT4, free thyroxine; TSH, thyroid-stimulating hormone; NFS, non-alcoholic fatty liver disease fibrosis score; TFQI-FT4, the thyroid feedback quantile-based index calculated by FT4; TFQI-FT3, the thyroid feedback quantile-based index calculated by FT3; TSHI, TSH index; TT4RI, thyrotropin T4 resistance index; TT3RI, thyrotropin T3 resistance index; FT3/FT4, FT3 to FT4 ratio | | | | | | |

**
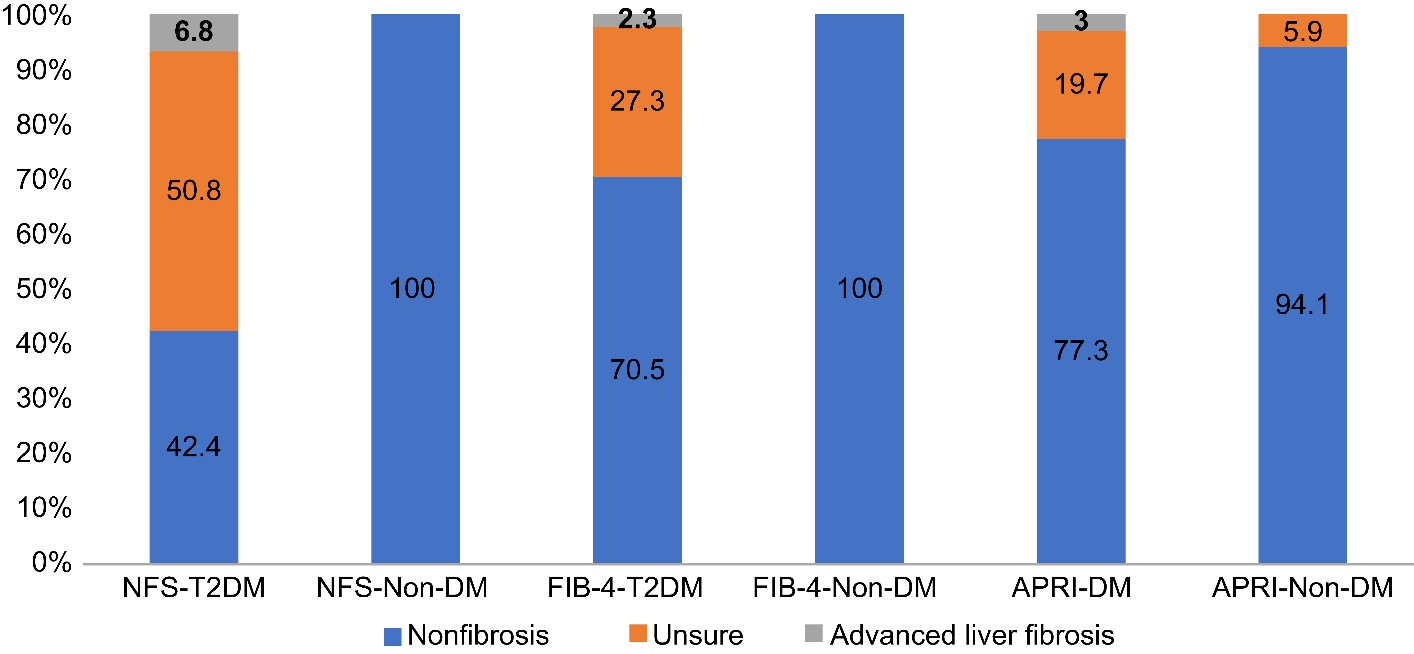
**

**Supplementary Figure 1. Incidence of advanced liver fibrosis in patients with T2DM and those without DM.**Bold font: Emphasize (the proportion of advanced liver fibrosis) (percentage)

Abbreviations: NFS, non-alcoholic fatty liver disease fibrosis score; FIB-4, fibrosis-4 index; APRI, aspartate aminotransferase to platelet ratio index; T2DM, type 2 diabetes mellitus

FT3, free triiodothyronine; FT4, free thyroxine; TSH, thyroid-stimulating hormone; TFQI-FT4, the thyroid feedback quantile-based index calculated by FT4; TFQI-FT3, the thyroid feedback quantile-based index calculated by FT3; TSHI, TSH index; TT4RI, thyrotropin T4 resistance index; TT3RI, thyrotropin T3 resistance index; FT3/FT4, FT3 to FT4 ratio; ROC, receiver operating characteristic curve
